# Supplementary material for: Effects of temperature on mating behaviour and mating success: a meta-analysis
Source: bioRxiv or medRxiv preprint supplement (doi:10.1101/2022.05.11.491542), 2022-05-12
Supplement: Supplementary file [file media-1.pdf]

**Supplementary Table 1.** Number of effect sizes ( $k$ ) in our data sets on mating latency, choosiness, and mating success.

|                                      | Mating latency | Choosiness | Mating success |
|--------------------------------------|----------------|------------|----------------|
| <i>Sex</i>                           |                |            |                |
| Female                               | 19             | 22         | 42             |
| Male                                 | 0              | 5          | 2              |
| Both                                 | 10             | 2          | 14             |
| <i>Time of temperature treatment</i> |                |            |                |
| Early development                    | 6              | 13         | 6              |
| Before mating                        | 11             | 0          | 14             |
| During mating                        | 12             | 16         | 38             |
| <i>Type of temperature treatment</i> |                |            |                |
| Acute exposure                       | 20             | 9          | 29             |
| Acclimation                          | 9              | 20         | 29             |

**Supplementary Table 2.** Summary of data extracted from each study used in the meta-analysis. For each study, we present an abbreviated reference to the study, the scientific name of the study species, and the types of data extracted from that study (i.e., mating latency, choosiness, and/or mating success).

| Study                         | Species                                                                                                 | Mating latency | Choosiness | Mating success |
|-------------------------------|---------------------------------------------------------------------------------------------------------|----------------|------------|----------------|
| Albrecht <i>et al.</i> (1999) | <i>Pomacea canaliculate</i>                                                                             | x              |            |                |
| Amin <i>et al.</i> (2010)     | <i>Bombus terrestris</i>                                                                                |                |            | x              |
| Arbogast (2007)               | <i>Plodia interpunctella</i>                                                                            |                |            | x              |
| Beaulieu & Sockman (2012)     | <i>Melospiza lincolnii</i>                                                                              |                | x          |                |
| Beckers & Schul (2008)        | <i>Neoconocephalus triops</i>                                                                           |                | x          |                |
| Brandt <i>et al.</i> (2018)   | <i>Habronattus clypeatus</i>                                                                            |                |            | x              |
| Caetano & Hajek (2017)        | <i>Sirex noctilio</i>                                                                                   |                |            | x              |
| Colinet & Hance (2009)        | <i>Aphidius colemani</i>                                                                                | x              |            | x              |
| Conrad <i>et al.</i> (2017)   | <i>Osmia bicornis</i>                                                                                   |                |            | x              |
| Coomes <i>et al.</i> (2019)   | <i>Taeniopygia guttata</i>                                                                              |                | x          |                |
| Delisle (1995)                | <i>Choristoneura rosaceana</i>                                                                          |                |            | x              |
| Dubey <i>et al.</i> (2016)    | <i>Menochilus sexmaculatus</i>                                                                          |                | x          |                |
| Everman <i>et al.</i> (2018)  | <i>Drosophila melanogaster</i>                                                                          | x              |            | x              |
| Fasolo & Krebs (2004)         | <i>Drosophila melanogaster</i> ,<br><i>Drosophila simulans</i> , <i>Drosophila</i><br><i>mojavensis</i> |                |            | x              |
| Geister & Fischer (2007)      | <i>Bicyclus anynana</i>                                                                                 |                |            | x              |
| Gerhardt (2005)               | <i>Hyla chrysoscelis</i>                                                                                |                | x          |                |
| Goebel (2006)                 | <i>Chilo sacchariphagus</i>                                                                             |                |            | x              |
| Grace & Shaw (2004)           | <i>Laupala cerasina</i>                                                                                 |                | x          |                |
| Hsu & Wu (2001)               | <i>Ctenocephalides felis</i>                                                                            |                |            | x              |
| Ingleby <i>et al.</i> (2013)  | <i>Drosophila simulans</i>                                                                              | x              |            | x              |
| Ismail <i>et al.</i> (2010)   | <i>Aphidius ervi</i>                                                                                    | x              | x          | x              |
| Janowitz & Fischer (2011)     | <i>Bicyclus anynana</i>                                                                                 | x              |            |                |
| Jiao <i>et al.</i> (2009)     | <i>Pardosa astrigera</i>                                                                                | x              |            |                |
| Kindle <i>et al.</i> (2006)   | <i>Grylloides sigillatus</i> , <i>Acheta</i><br><i>domesticus</i>                                       |                |            | x              |
| Kvanerno & Forsgren (2000)    | <i>Pomatoschistus minutus</i>                                                                           |                | x          |                |
| Laudien & Seifert (1983)      | <i>Drosophila simulans</i>                                                                              |                |            | x              |
| McKibben & Bass (1998)        | <i>Porichthys notatus</i>                                                                               |                | x          |                |

|                                |                                                                                                         |   |   |   |
|--------------------------------|---------------------------------------------------------------------------------------------------------|---|---|---|
| Mhatre <i>et al.</i> (2011)    | <i>Oecanthus henryi</i>                                                                                 | x |   |   |
| Milner <i>et al.</i> (2010)    | <i>Uca mjoebergi</i>                                                                                    |   | x |   |
| Olvido <i>et al.</i> (2010)    | <i>Allonemobius socius</i>                                                                              |   | x |   |
| Papadopoulou (2006)            | <i>Lasioderma serricone</i>                                                                             |   |   | x |
| Parkash <i>et al.</i> (2011)   | <i>Drosophila melanogaster</i>                                                                          | x |   |   |
| Patton & Krebs (2001)          | <i>Drosophila melanogaster</i> ,<br><i>Drosophila simulans</i> , <i>Drosophila</i><br><i>mojavensis</i> |   |   | x |
| Pires & Hoy (1992)             | <i>Gryllus firmus</i>                                                                                   | x |   |   |
| Punzalan <i>et al.</i> (2008)  | <i>Phymata americana</i>                                                                                | x |   | x |
| Putz & Crews (2005)            | <i>Eublepharis maculatus</i>                                                                            |   | x |   |
| Ritchie <i>et al.</i> (2001)   | <i>Drosophila montana</i>                                                                               |   | x |   |
| Sambucetti & Norry (2015)      | <i>Drosophila buzzatii</i>                                                                              |   |   | x |
| Scharf <i>et al.</i> (2019)    | <i>Tribolium castaneum</i>                                                                              | x |   | x |
| Sih <i>et al.</i> (2002)       | <i>Aquarius remiges</i>                                                                                 |   |   | x |
| Singh <i>et al.</i> (2016)     | <i>Drosophila melanogaster</i>                                                                          | x |   | x |
| Stazione <i>et al.</i> (2019)  | <i>Drosophila melanogaster</i>                                                                          | x |   |   |
| Suzaki <i>et al.</i> (2018)    | <i>Lasioderma serricone</i>                                                                             | x |   | x |
| Symes <i>et al.</i> (2017)     | <i>Oecanthus forbesi</i>                                                                                |   | x |   |
| Vasudeva <i>et al.</i> (2018)  | <i>Callosobruchus maculatus</i>                                                                         |   |   | x |
| Westerman & Monteiro<br>(2016) | <i>Bicyclus anynana</i>                                                                                 | x |   |   |
| Wilson <i>et al.</i> (2007)    | <i>Gambusia holbrooki</i>                                                                               |   |   | x |
| Yang <i>et al.</i> (2017)      | <i>Nilaparvata lugens</i>                                                                               |   |   | x |
| Yenisetti <i>et al.</i> (2006) | <i>Phorticella striata</i>                                                                              | x |   | x |
| Zhang <i>et al.</i> (2013)     | <i>Plutella xylostella</i>                                                                              | x |   | x |
| Zhang <i>et al.</i> (2016)     | <i>Neoseiulus barkeri</i>                                                                               | x |   |   |
| Zizzari & Ellers (2011)        | <i>Orchesella cincta</i>                                                                                |   |   | x |
| Zverev <i>et al.</i> (2018)    | <i>Chrysomela lapponica</i>                                                                             |   |   | x |

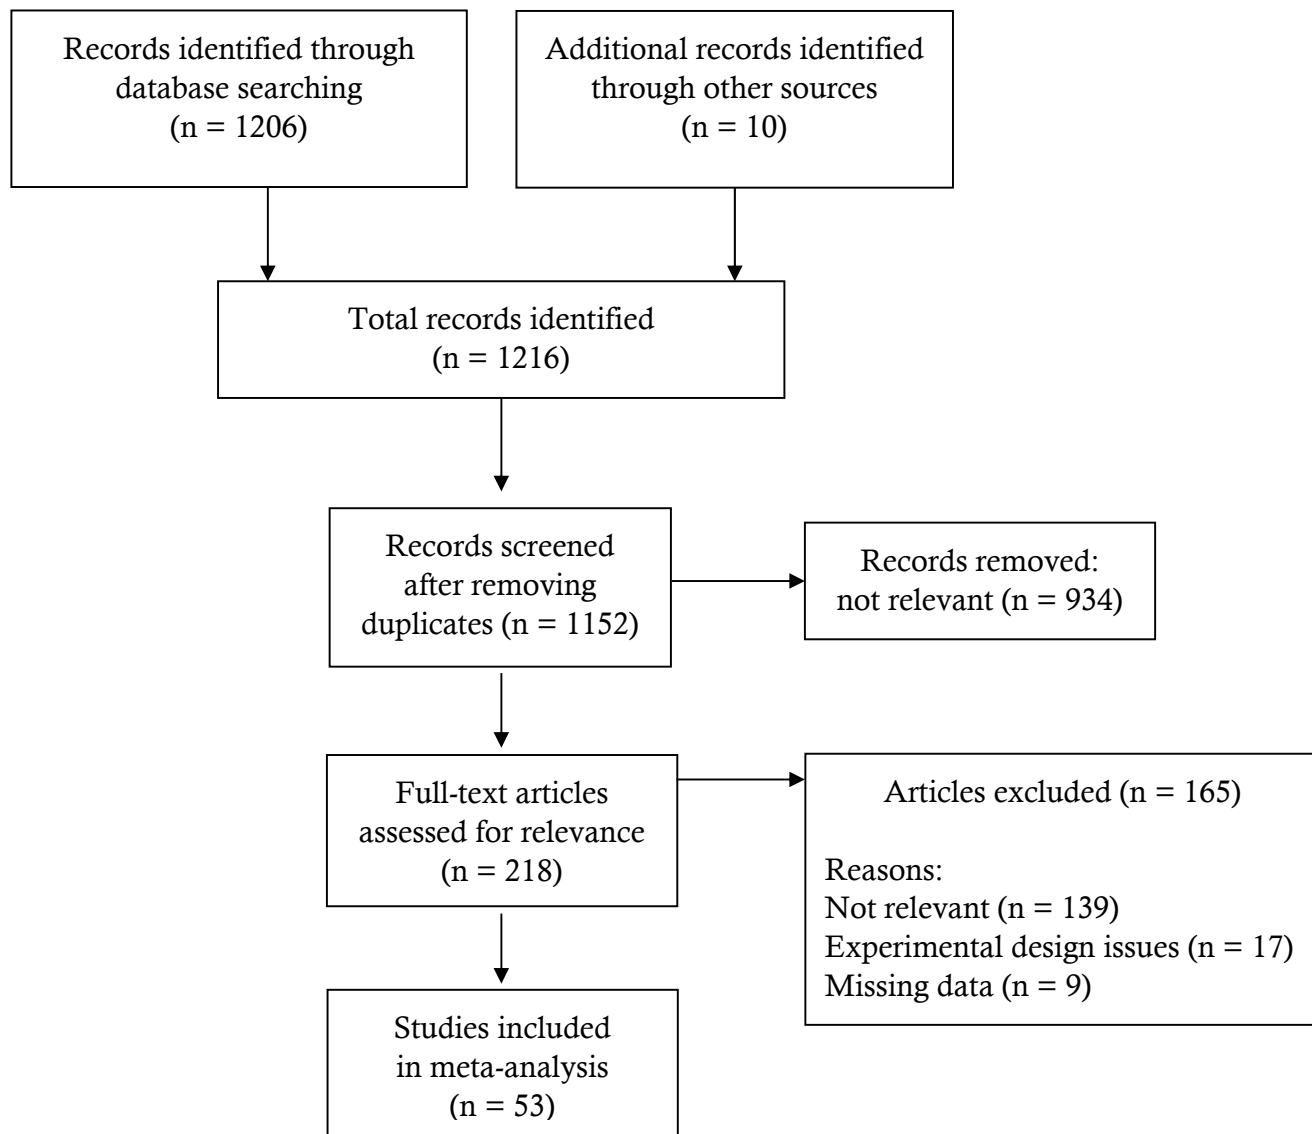

**Supplementary Figure 1.** PRISMA diagram showing the selection process for the studies included in this meta-analysis.

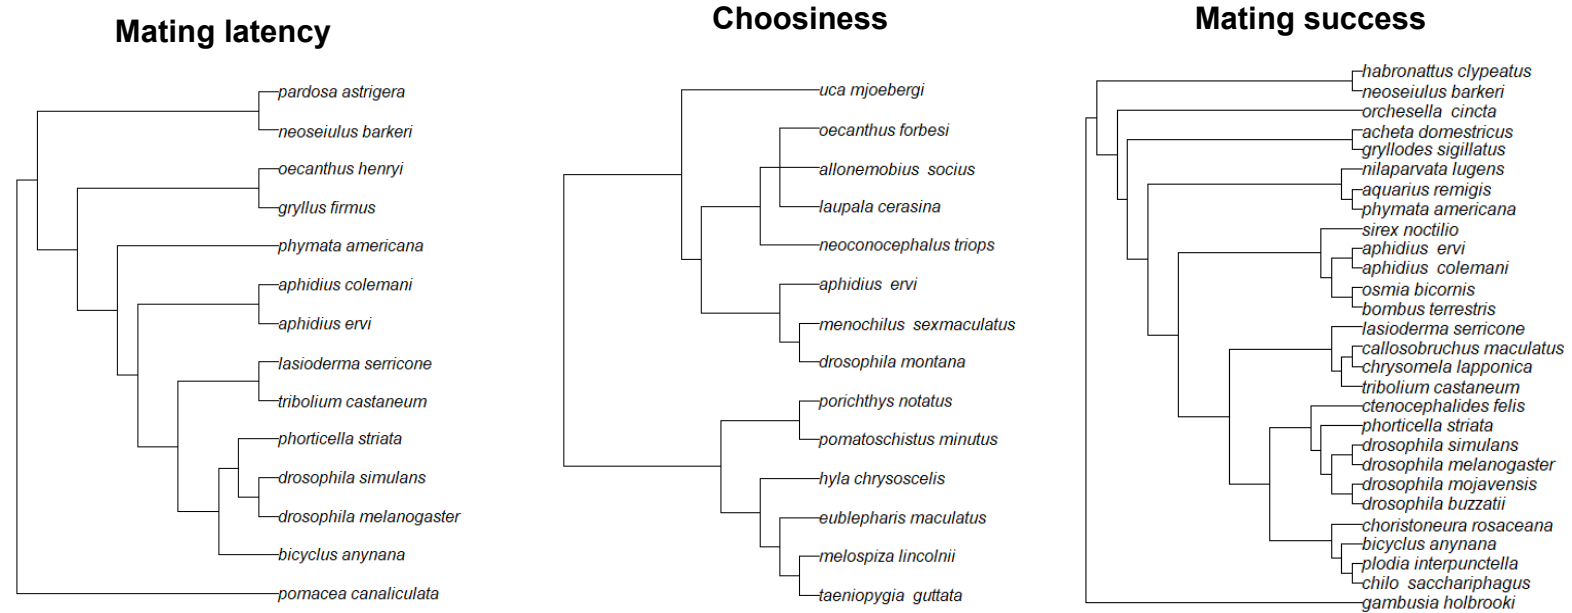

**Supplementary Figure 2.** Phylogenetic trees for the species included in the mating latency, choosiness, and mating success datasets used in the meta-analysis.

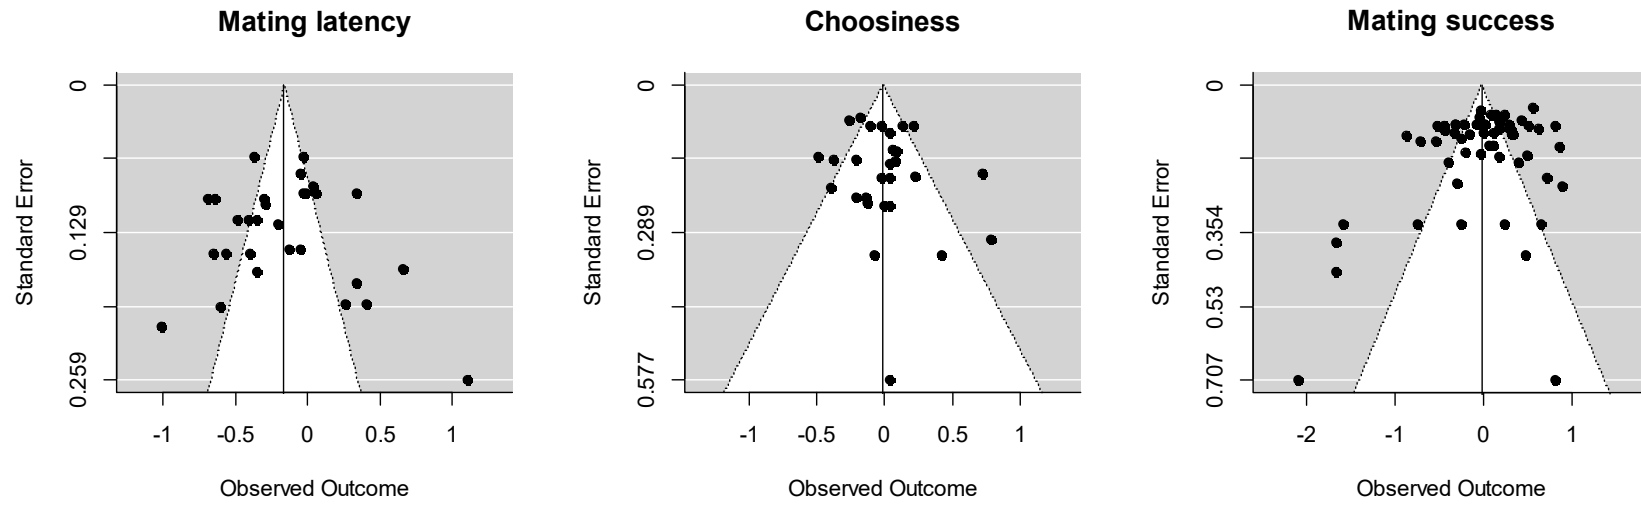

**Supplementary Figure 3.** Funnel plots generated to examine the potential for underreporting of non-significant results in each of our three datasets (mating latency, choosiness, and mating success).

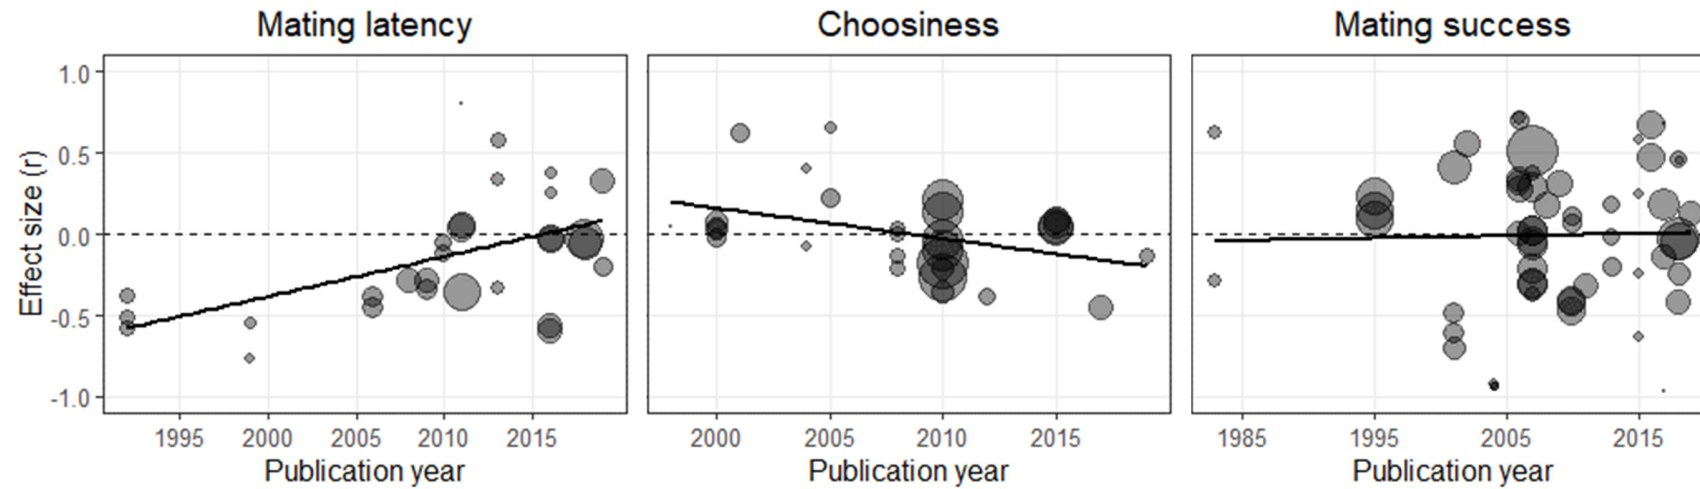

**Supplementary Figure 4.** Effect size ( $r$ ) of the relationship between temperature and mating latency, choosiness, or mating success over time. The relative size of each point represents the sample size of each effect size. The solid black line represents the regression of effect size by publication year.

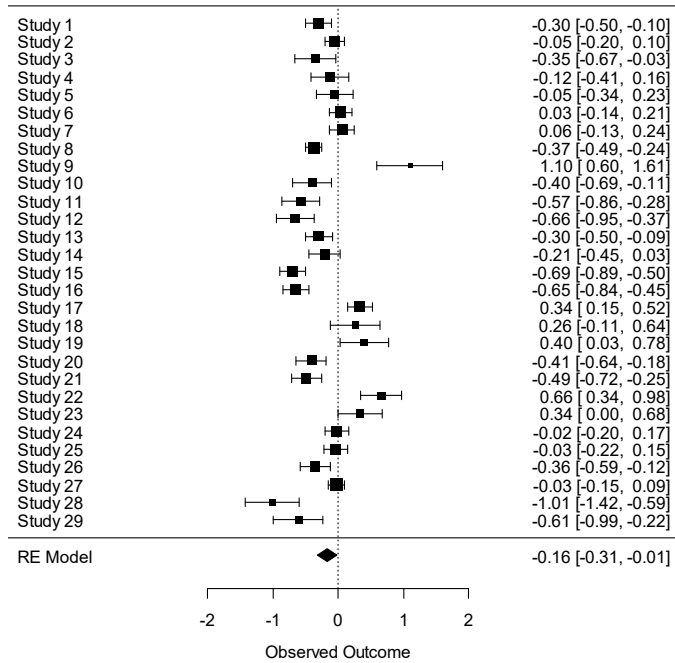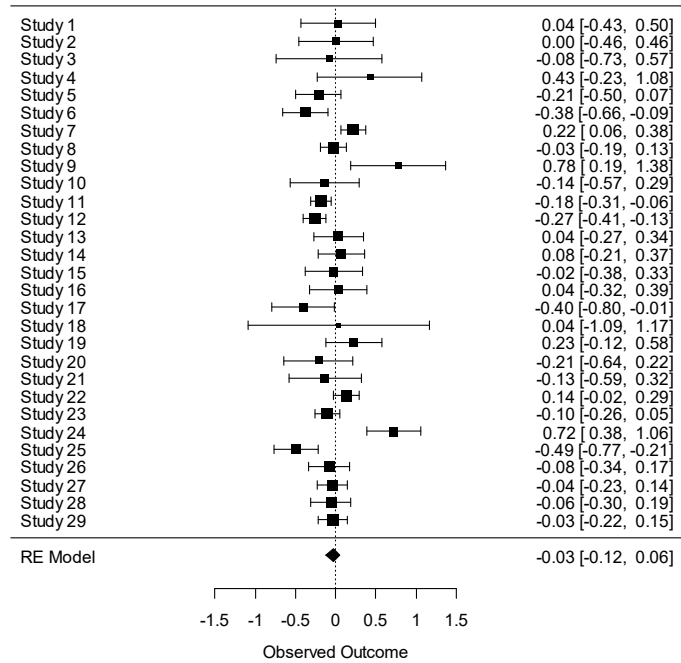

Supplementary Figure 5. Forest plots for mating latency (left) and choosiness (right).



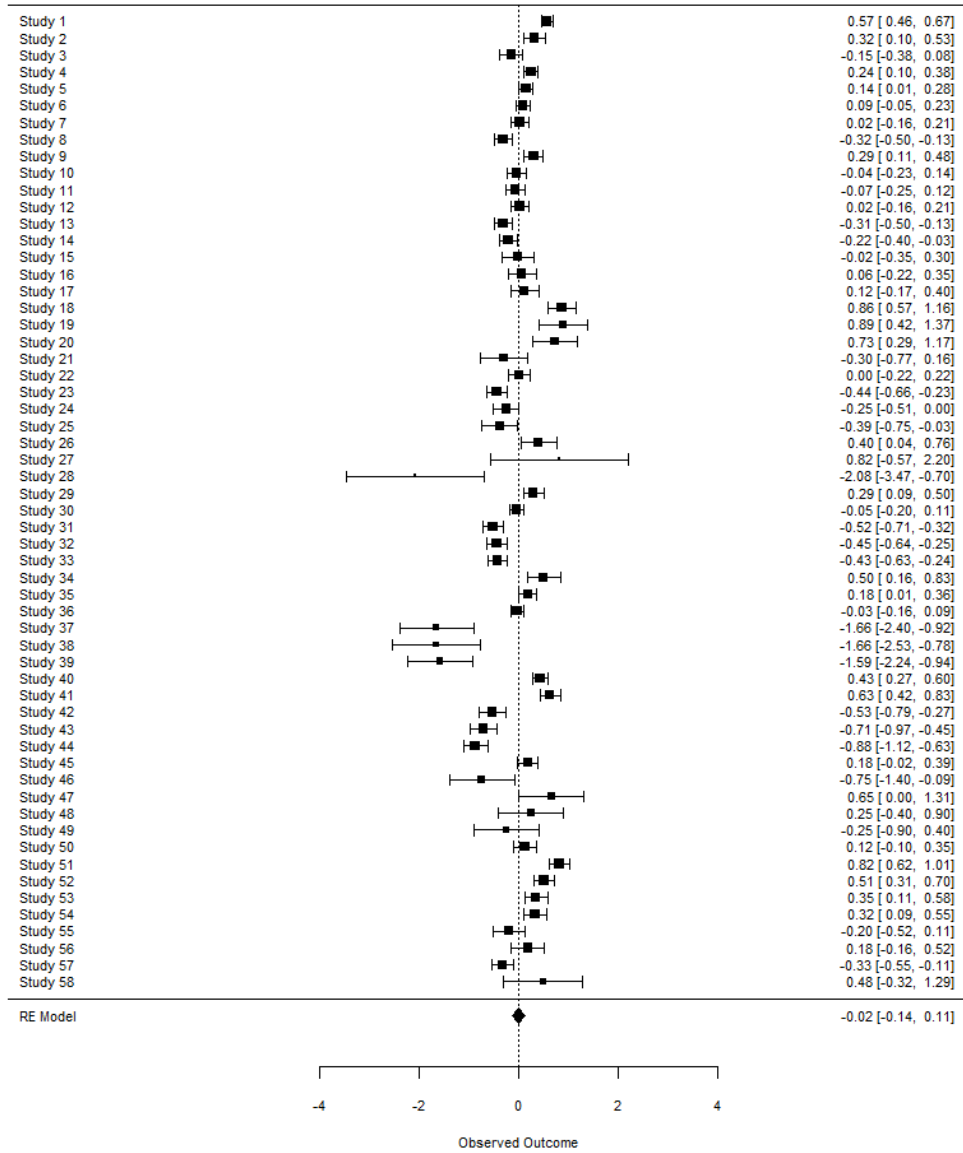

**Supplementary Figure 6.** Forest plot for mating success.

## Supplementary References

- Albrecht, E. A., Carreño, N. B., & Castro-Vazquez, A. (1999). A quantitative study of environmental factors influencing the seasonal onset of reproductive behaviour in the South American apple-snail *Pomacea canaliculata* (Gastropoda: Ampullariidae). *Journal of Molluscan Studies*, 65(2), 241–250. <https://doi.org/10.1093/mollus/65.2.241>
- Amin, M. R., Than, K. K., & Kwon, Y. J. (2010). Mating status of bumblebees, *Bombus terrestris* (Hymenoptera: Apidae) with notes on ambient temperature, age and virginity. *Applied Entomology and Zoology*, 45(3), 363–367. <https://doi.org/10.1303/aez.2010.363>
- Arbogast, R. T. (2007). A wild strain of *Plodia interpunctella* (Hübner) (Lepidoptera: Pyralidae) from farm-stored maize in South Carolina: effect of temperature on mating, survival, and fecundity. *Journal of Stored Products Research*, 43(4), 503–507.
- Beaulieu, M., & Sockman, K. W. (2012). Song in the cold is “hot”: memory of and preference for sexual signals perceived under thermal challenge. *Biology Letters*, 8(5), 751–753. <https://doi.org/10.1098/rsbl.2012.0481>
- Beckers, O. M., & Schul, J. (2008). Developmental plasticity of mating calls enables acoustic communication in diverse environments. *Proceedings of the Royal Society B: Biological Sciences*, 275(1640), 1243–1248. <https://doi.org/10.1098/rspb.2007.1765>
- Brandt, E. E., Kelley, J. P., & Elias, D. O. (2018). Temperature alters multimodal signaling and mating success in an ectotherm. *Behavioral Ecology and Sociobiology*, 72(12). <https://doi.org/10.1007/s00265-018-2620-5>
- Caetano, I. A. L., & Hajek, A. E. (2017). Mating behavior and sexual receptivity of *Sirex noctilio* (Hymenoptera: Siricidae). *Annals of the Entomological Society of America*, saw095. <https://doi.org/10.1093/aesa/saw095>
- Colinet, H., & Hance, T. (2009). Male reproductive potential of *Aphidius colemani* (Hymenoptera: Aphidiinae) exposed to constant or fluctuating thermal regimens. *Environmental Entomology*, 38(1), 242–249. <https://doi.org/10.1603/022.038.0130>
- Conrad, T., Stöcker, C., & Ayasse, M. (2017). The effect of temperature on male mating signals and female choice in the red mason bee, *Osmia bicornis* (L.). *Ecology and Evolution*, 7(21), 8966–8975. <https://doi.org/10.1002/ece3.3331>
- Coomes, C. M., Danner, R. M., & Derryberry, E. P. (2019). Elevated temperatures reduce discrimination between conspecific and heterospecific sexual signals. *Animal Behaviour*, 147, 9–15. <https://doi.org/10.1016/j.anbehav.2018.10.024>
- Delisle, J. (1995). Effect of male and female age on the mating success of the obliquebanded leafroller *Choristoneura rosaceana* (Lepidoptera: Tortricidae) under different ecological conditions. *Journal of Insect Behavior*, 8(6), 781–799.
- Dubey, A., Omkar, & Mishra, G. (2016). Influence of temperature on reproductive biology and phenotype of a ladybird, *Menochilus sexmaculatus* (Fabricius) (Coleoptera: Coccinellidae). *Journal of Thermal Biology*, 58, 35–42.

- Everman, E. R., Delzeit, J. L., Hunter, F. K., Gleason, J. M., & Morgan, T. J. (2018). Costs of cold acclimation on survival and reproductive behavior in *Drosophila melanogaster*. *Plos One*, 13(5), e0197822. <https://doi.org/10.1371/journal.pone.0197822>
- Fasalo, A. G., & Krebs, R. A. (2004). A comparison of behavioural change in *Drosophila* during exposure to thermal stress. *Biological Journal of the Linnean Society*, 83(2), 197–205. <https://doi.org/10.1111/j.1095-8312.2004.00380.x>
- Geister, T. L., & Fischer, K. (2007). Testing the beneficial acclimation hypothesis: temperature effects on mating success in a butterfly. *Behavioral Ecology*, 18(4), 658–664. <https://doi.org/10.1093/beheco/arm024>
- Gerhardt, H. C. (2005). Advertisement-call preferences in diploid-tetraploid treefrogs (*Hyla chrysoscelis* and *Hyla versicolor*): implications for mate choice and the evolution of communication systems. *Evolution*, 59(2), 395–408. <https://doi.org/10.1111/j.0014-3820.2005.tb00998.x>
- Goebel, R. (2006). The effect of temperature on development and reproduction of the sugarcane stalk borer, *Chilo sacchariphagus* (Bojer 1856) (Lepidoptera: Crambidae). *African Entomology*, 14(1), 00–00.
- Grace, J. L., & Shaw, K. L. (2004). Effects of developmental environment on signal-preference coupling in a Hawaiian cricket. *Evolution*, 58(7), 1627–1633.
- Hsu, M. H., & Wu, W. J. (2001). Off-host observations of mating and postmating behaviors in the cat flea (Siphonaptera: Pulicidae). *Journal of Medical Entomology*, 38(3), 352–360. <https://doi.org/10.1603/0022-2585-38.3.352>
- Ingleby, F. C., Hunt, J., & Hosken, D. J. (2013). Genotype-by-environment interactions for female mate choice of male cuticular hydrocarbons in *Drosophila simulans*. *Plos One*, 8(6), e67623. <https://doi.org/10.1371/journal.pone.0067623>
- Ismail, M., Vernon, P., Hance, T., & van Baaren, J. (2010). Physiological costs of cold exposure on the parasitoid *Aphidius ervi*, without selection pressure and under constant or fluctuating temperatures. *BioControl*, 55(6), 729–740.
- Janowitz, S. A., & Fischer, K. (2011). Opposing effects of heat stress on male versus female reproductive success in *Bicyclus anynana* butterflies. *Journal of Thermal Biology*, 36(5), 283–287. <https://doi.org/10.1016/j.jtherbio.2011.04.001>
- Jiao, X., Wu, J., Chen, Z., Chen, J., & Liu, F. (2009). Effects of temperature on courtship and copulatory behaviours of a wolf spider *Pardosa astrigera* (Araneae: Lycosidae). *Journal of Thermal Biology*, 34(7), 348–352.
- Kindle, T. K., Johnson, K. M., Ivy, T. M., Weddle, C. B., & Sakaluk, S. K. (2006). Female mating frequency increases with temperature in two cricket species, *Gryllodes sigillatus* and *Acheta domesticus* (Orthoptera: Gryllidae). *Canadian Journal of Zoology*, 84(9), 1345–1350. <https://doi.org/10.1139/z06-127>
- Kvarnemo, C., & Forsgren, E. (2000). The influence of potential reproductive rate and variation in mate quality on male and female choosiness in the sand goby, *Pomatoschistus minutus*. *Behavioral Ecology and Sociobiology*, 48(5), 378–384. <https://doi.org/10.1007/s002650000246>

- Laudien, H., & Seifert, U. (1983). Influence of breeding- and experimental-temperature on courtship and copulation in *Drosophila simulans*. *Journal of Thermal Biology*, 8(4), 435–437. [https://doi.org/10.1016/0306-4565\(83\)90044-X](https://doi.org/10.1016/0306-4565(83)90044-X)
- McKibben, J. R., & Bass, A. H. (1998). Behavioral assessment of acoustic parameters relevant to signal recognition and preference in a vocal fish. *The Journal of the Acoustical Society of America*, 104(6), 3520–3533. <https://doi.org/10.1121/1.423938>
- Mhatre, N., Bhattacharya, M., Robert, D., & Balakrishnan, R. (2011). Matching sender and receiver: poikilothermy and frequency tuning in a tree cricket. *Journal of Experimental Biology*, 214(15), 2569–2578. <https://doi.org/10.1242/jeb.057612>
- Milner, R. N. C., Detto, T., Jennions, M. D., & Backwell, P. R. Y. (2010). Experimental evidence for a seasonal shift in the strength of a female mating preference. *Behavioral Ecology*, 21(2), 311–316. <https://doi.org/10.1093/beheco/arp196>
- Olvido, A. E., Fernandes, P. R., & Mousseau, T. A. (2010). Relative effects of juvenile and adult environmental factors on mate attraction and recognition in the cricket, *Allonemobius socius*. *Journal of Insect Science*, 10(90), 1–17.
- Papadopoulou, S. (2006). Observations on the mating behavior of *Lasioderma serricorne* (F.) adults and experiments on their nutritional requirements in dried tobacco. *The Coleopterists Bulletin*, 60(4), 291–296.
- Parkash, R., Sharma, V., Chahal, J., Lambhod, C., & Kajla, B. (2011). Impact of body melanization on mating success in *Drosophila melanogaster*. *Entomologia Experimentalis et Applicata*, 139(1), 47–59. <https://doi.org/10.1111/j.1570-7458.2011.01102.x>
- Patton, Z. J., & Krebs, R. A. (2001). The effect of thermal stress on the mating behavior of three *Drosophila* species. *Physiological and Biochemical Zoology*, 74(6), 783–788. <https://doi.org/10.1086/323327>
- Pires, A., & Hoy, R. R. (1992). Temperature coupling in cricket acoustic communication. *Journal of Comparative Physiology A*, 171(1), 69–78.
- Punzalan, D., Rodd, F. H., & Rowe, L. (2008). Sexual selection mediated by the thermoregulatory effects of male colour pattern in the ambush bug *Phymata americana*. *Proceedings of the Royal Society B: Biological Sciences*, 275(1634), 483–492.
- Putz, O., & Crews, D. (2005). Embryonic origin of mate choice in a lizard with temperature-dependent sex determination. *Developmental Psychobiology*, 48(1), 29–38.
- Ritchie, M. G., Saarikettu, M., Livingstone, S., & Hoikkala, A. (2001). Characterization of female preference functions for *Drosophila montana* courtship song and a test of the temperature coupling hypothesis. *Evolution*, 55(4), 721–727.
- Sambucetti, P., & Norry, F. M. (2015). Mating success at high temperature in highland- and lowland-derived populations as well as in heat knock-down selected *Drosophila buzzatii*. *Entomologia Experimentalis et Applicata*, 154(3), 206–212.
- Scharf, I., Wertheimer, K.-O., Xin, J. L., Gilad, T., Goldenberg, I., & Subach, A. (2019). Context-dependent effects of cold stress on behavioral, physiological, and life-history traits of the red flour beetle. *Insect Science*, 26, 142–153.

- Sih, A., Lauer, M., & Krupa, J. J. (2002). Path analysis and the relative importance of male–female conflict, female choice and male–male competition in water striders. *Animal Behaviour*, 63(6), 1079–1089. <https://doi.org/10.1006/anbe.2002.2002>
- Singh, K., Samant, M. A., Tom, M. T., & Prasad, N. G. (2016). Evolution of pre- and post-copulatory traits in male *Drosophila melanogaster* as a correlated response to selection for resistance to cold stress. *Plos One*, 11(4), e0153629. <https://doi.org/10.1371/journal.pone.0153629>
- Stazione, L., Norry, F. M., & Sambucetti, P. (2019). Heat-hardening effects on mating success at high temperature in *Drosophila melanogaster*. *Journal of Thermal Biology*, 80, 172–177. <https://doi.org/10.1016/j.jtherbio.2019.02.001>
- Suzaki, Y., Kodera, S., Fujiwara, H., Sasaki, R., Okada, K., & Katsuki, M. (2018). Temperature variations affect postcopulatory but not precopulatory sexual selection in the cigarette beetle. *Animal Behaviour*, 144, 115–123.
- Symes, L. B., Rodríguez, R. L., & Höbel, G. (2017). Beyond temperature coupling: effects of temperature on ectotherm signaling and mate choice and the implications for communication in multispecies assemblages. *Ecology and Evolution*, 7(15), 5992–6002. <https://doi.org/10.1002/ece3.3059>
- Vasudeva, R., Deeming, D. C., & Eady, P. E. (2018). Larval developmental temperature and ambient temperature affect copulation duration in a seed beetle. *Behaviour*, 155(1), 69–82. <https://doi.org/10.1163/1568539X-00003479>
- Westerman, E., & Monteiro, A. (2016). Rearing temperature influences adult response to changes in mating status. *Plos One*, 11(2), e0146546.
- Wilson, R. S., Hammill, E., & Johnston, I. A. (2007). Competition moderates the benefits of thermal acclimation to reproductive performance in male eastern mosquitofish. *Proceedings of the Royal Society B: Biological Sciences*, 274(1614), 1199–1204. <https://doi.org/10.1098/rspb.2006.0401>
- Yang, B.-J., Liu, M.-L., Zhang, Y.-X., & Liu, Z.-W. (2017). Effects of temperature on fitness costs in chlorpyrifos-resistant brown planthopper, *Nilaparvata lugens* (Hemiptera: Delphacidae). *Insect Science*, 25(3), 409–417. <https://doi.org/10.1111/1744-7917.12432>
- Yenisetti, S. C., Hegde, S. N., Venkateswarlu, M., & Krishna, M. S. (2006). Phenotypic plasticity of sexual behavior at different temperatures in a Drosophilid: *Phorticella striata*. *Korean J. Genetics*, 28(4), 395-401.
- Zhang, G. H., Li, Y. Y., Zhang, K. J., Wang, J. J., Liu, Y. Q., & Liu, H. (2016). Effects of heat stress on copulation, fecundity and longevity in newly-emerged adults of the predatory mite *Neoseiulus barkeri* (Acari: Phytoseiidae). *Systematic and Applied Acarology*, 21(3), 295. <https://doi.org/10.11158/saa.21.3.5>
- Zhang, W., Zhao, F., Hoffmann, A. A., & Ma, C.-S. (2013). A single hot event that does not affect survival but decreases reproduction in the diamondback moth, *Plutella xylostella*. *Plos One*, 8(10), e75923. <https://doi.org/10.1371/journal.pone.0075923>

- Zizzari, Z. V., & Ellers, J. (2011). Effects of exposure to short-term heat stress on male reproductive fitness in a soil arthropod. *Journal of Insect Physiology*, 57(3), 421–426. <https://doi.org/10.1016/j.jinsphys.2011.01.002>
- Zverev, V., Kozlov, M. V., Forsman, A., & Zvereva, E. L. (2018). Ambient temperatures differently influence colour morphs of the leaf beetle *Chrysomela lapponica*: Roles of thermal melanism and developmental plasticity. *Journal of Thermal Biology*, 74, 100–109. <https://doi.org/10.1016/j.jtherbio.2018.03.019>
